# Supplementary material for: The Protective Effects of Ganoderic Acids from Ganoderma lucidum Fruiting Body on Alcoholic Liver Injury and Intestinal Microflora Disturbance in Mice with Excessive Alcohol Intake
Source: MDPI journal article supplement (doi:10.3390/foods11070949), 2022-03-25
Supplement: s1 [file s1]

## Supplementary Materials

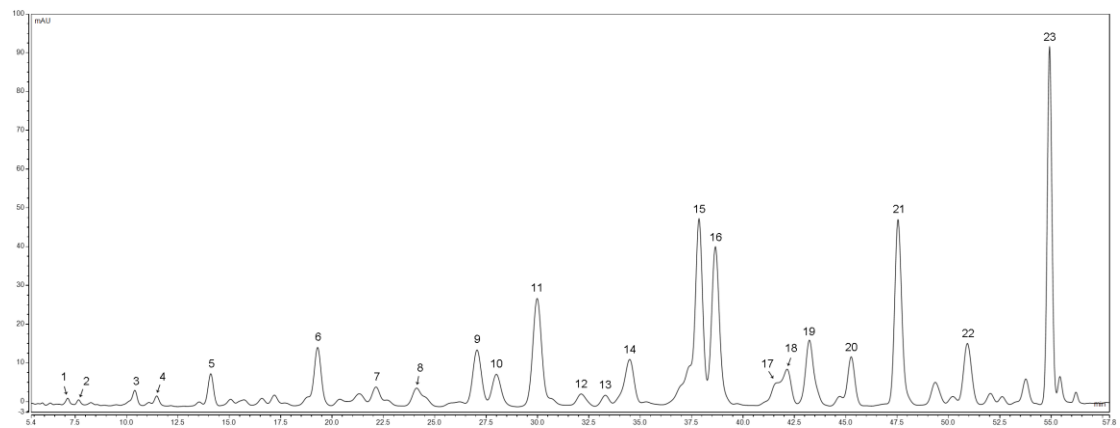

**Figure S1.** Phytochemical analysis of ganoderic acids (GA) performed through high performance liquid chromatography (HPLC) coupled with a QTOF electrospray ionization MS system at negative ion mode.
